# Supplementary material for: Nanocrystalline Cellulose-Supported Iron Oxide Composite Materials for High-Performance Lithium-Ion Batteries
Source: MDPI journal article supplement (doi:10.3390/polym16050691), 2024-03-02
Supplement: s1 [file s1]

# Nanocrystalline Cellulose-Supported Iron Oxide Composite Materials for High-Performance Lithium-Ion Batteries

Quang Nhat Tran, Chan Ho Park \* and Thi Hoa Le \*

Department of Chemical and Biological Engineering, Gachon University, 1342 Seongnam-daero, Sujeong-gu, Seongnam-si 13120, Republic of Korea; tran.nhat147@gachon.ac.kr

\* Correspondence: chhopark@gachon.ac.kr (C.H.P.); lehoa290792@gachon.ac.kr (T.H.L.)

---

### Figure Caption of the Supporting Information

**Figure S1.** Carboxyl groups on the NCC surface obtained through oxidation of the primary hydroxyl groups at the C6 position.

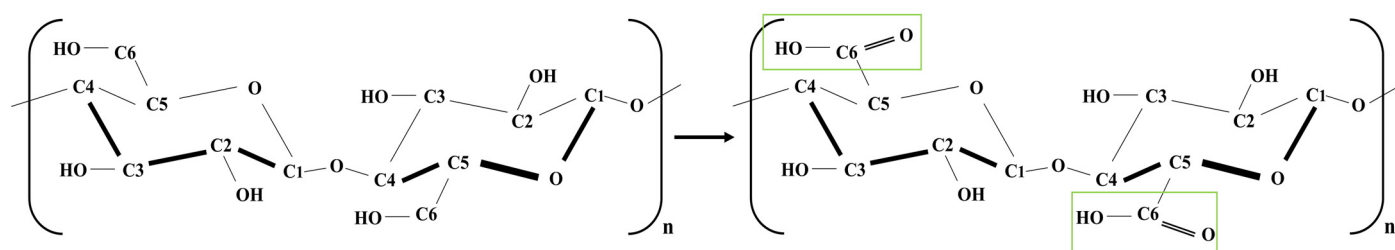

**Figure S1.** Carboxyl groups on the NCC surface obtained through oxidation of the primary hydroxyl groups at the C6 position.
